# Supplementary material for: Phylogenomic and phenotypic analyses highlight the diversity of antibiotic resistance and virulence in both human and non-human Acinetobacter baumannii
Source: PubMed Central journal article supplement (PMC10964423; doi:10.1128/msphere.00741-23), 2024-03-05

# Supplement Figures

Comparative phylogenomic and phenotypic analysis highlights diversity of antibiotic resistance and virulence in *Acinetobacter baumannii*



# Figure 1b – AdeN AA1-105

| Accession         | Sequence                                                                                                                                                           | Position |
|-------------------|--------------------------------------------------------------------------------------------------------------------------------------------------------------------|----------|
| AB052-MST-SNC-8   | MHDPVLESHHLVCEKPQTRRCIERRLALLLSATELFLEKGYDAVSLDDIVNHAGGSKTSIYKYFGNKDGLFTAICDYRREMFFKDICIAFQPEQTSLKDYLIQTL                                                          | 105      |
| AB428-AcS20       | MHDPVLESHHLVCEKPQTRRCIERRLALLLSATELFLEKGYDAVSLDDIVNHAGGSKTSIYKYFGNKDGLFTAICDYRREMFFKDICIAFQPEQTSLKDYLIQTL                                                          | 105      |
| AB422-MST-SNC-24  | MHDPVLESHHLVCEKPQTRRCIERRLALLLSATELFLEKGYDAVSLDDIVNHAGGSKTSIYKYFGNKDGLFTAICDYRREMFFKDICIAFQPEQTSLKDYLIQTL                                                          | 105      |
| AB220-IK38        | MHDPVLESHHLVCEKPQTRRCIERRLALLLSATELFLEKGYDAVSLDDIVNHAGGSKTSIYKYFGNKDGLFTAICDYRREMFFKDICIAFQPEQTSLKDYLIQTL                                                          | 105      |
| AB215-IK33        | MHDPVLESHHLVCEKPQTRRCIERRLALLLSATELFLEKGYDAVSLDDIVNHAGGSKTSIYKYFGNKDGLFTAICDYRREMFFKDICIAFQPEQTSLKDYLIQTL                                                          | 105      |
| AB421-MST-SNC-9   | MHDPVLESHHLVCEKPQTRRCIERRLALLLSATELFLEKGYDAVSLDDIVNHAGGSKTSIYKYFGNKDGLFTAICDYRREMFFKDICIAFQPEQTSLKDYLIQTL                                                          | 105      |
| AB046             | MHDPVLESHHLVCEKPQTRRCIERRLALLLSATELFLEKGYDAVSLDDIVNHAGGSKTSIYKYFGNKDGLFTAICDYRREMFFKDICIAFQPEQTSLKDYLIQTL                                                          | 105      |
| AB338-IK12        | MHDPVLESHHLVCEKPQTRRCIERRLALLLSATELFLEKGYDAVSLDDIVNHAGGSKTSIYKYFGNKDGLFTAICDYRREMFFKDICIAFQPEQTSLKDYLIQTL                                                          | 105      |
| AB341-IK15        | MHDPVLESHHLVCEKPQTRRCIERRLALLLSATELFLEKGYDAVSLDDIVNHAGGSKTSIYKYFGNKDGLFTAICDYRREMFFKDICIAFQPEQTSLKDYLIQTL                                                          | 105      |
| AB345-IK19        | MHDPVLESHHLVCEKPQTRRCIERRLALLLSATELFLEKGYDAVSLDDIVNHAGGSKTSIYKYFGNKDGLFTAICDYRREMFFKDICIAFQPEQTSLKDYLIQTL                                                          | 105      |
| AB351-IK26        | MHDPVLESHHLVCEKPQTRRCIERRLALLLSATELFLEKGYDAVSLDDIVNHAGGSKTSIYKYFGNKDGLFTAICDYRREMFFKDICIAFQPEQTSLKDYLIQTL                                                          | 105      |
| AB354-IK29        | MHDPVLESHHLVCEKPQTRRCIERRLALLLSATELFLEKGYDAVSLDDIVNHAGGSKTSIYKYFGNKDGLFTAICDYRREMFFKDICIAFQPEQTSLKDYLIQTL                                                          | 105      |
| AB224-IK42        | MHDPVLESHHLVCEKPQTRRCIERRLALLLSATELFLEKGYDAVSLDDIVNHAGGSKTSIYKYFGNKDGLFTAICDYRREMFFKDICIAFQPEQTSLKDYLIQTL                                                          | 105      |
| AB424-AcS9        | MHDPVLESHHLVCEKPQTRRCIERRLALLLSATELFLEKGYDAVSLDDIVNHAGGSKTSIYKYFGNKDGLFTAICDYRREMFFKDICIAFQPEQTSLKDYLIQTL                                                          | 105      |
| AB427-AcS19       | MHDPVLESHHLVCEKPQTRRCIERRLALLLSATELFLEKGYDAVSLDDIVNHAGGSKTSIYKYFGNKDGLFTAICDYRREMFFKDICIAFQPEQTSLKDYLIQTL                                                          | 105      |
| ATCC17978         | MHDPVLESHHLVCEKPQTRRCIERRLALLLSATELFLEKGYDAVSLDDIVNHAGGSKTSIYKYFGNKDGLFTAICDYRREMFFKDICIAFQPEQTSLKDYLIQTL                                                          | 105      |
| AB216-IK34        | MHDPVLESHHLVCEKPQTRRCI.....YDAVSLDDIVNHAGGSKTSIYKYFGNKDGLFTAICDYRREMFFKDICIAFQPEQTSLKDYLIQTL                                                                       | 88       |
| AB030             | MHDPVLESHHLVCEKPQTRRCIERRLALLLSATELFLEKGYDAVSLDDIVNHAGGSKTSIYKYFGNKDGLFTAICDYRREMFFKDICIAFQPEQTSLKDYLIQTL                                                          | 105      |
| AB337-IK11        | MHDPVLESHHLVCEKPQTRRCIERRLALLLSATELFLEKGYDAVSLDDIVNHAGGSKTSIYKYFGNKDGLFTAICDYRREMFFKDICIAFQPEQTSLKDYLIQTL                                                          | 105      |
| AB339-IK13        | MHDPVLESHHLVCEKPQTRRCIERRLALLLSATELFLEKGYDAVSLDDIVNHAGGSKTSIYKYFGNKDGLFTAICDYRREMFFKDICIAFQPEQTSLKDYLIQTL                                                          | 105      |
| AB342-IK16        | MHDPVLESHHLVCEKPQTRRCIERRLALLLSATELFLEKGYDAVSLDDIVNHAGGSKTSIYKYFGNKDGLFTAICDYRREMFFKDICIAFQPEQTSLKDYLIQTL                                                          | 105      |
| AB346-IK20        | MHDPVLESHHLVCEKPQTRRCIERRLALLLSATELFLEKGYDAVSLDDIVNHAGGSKTSIYKYFGNKDGLFTAICDYRREMFFKDICIAFQPEQTSLKDYLIQTL                                                          | 105      |
| AB352-IK27        | MHDPVLESHHLVCEKPQTRRCIERRLALLLSATELFLEKGYDAVSLDDIVNHAGGSKTSIYKYFGNKDGLFTAICDYRREMFFKDICIAFQPEQTSLKDYLIQTL                                                          | 105      |
| AB214-IK32        | MHDPVLESHHLVCEKPQTRRCIERRLALLLSATELFLEKGYDAVSLDDIVNHAGGSKTSIYKYFGNKDGLFTAICDYRREMFFKDICIAFQPEQTSLKDYLIQTL                                                          | 105      |
| AB420-MST-SNC-5   | MHDPVLESHHLVCEKPQTRRCIERRLALLLSATELFLEKGYDAVSLDDIVNHAGGSKTSIYKYFGNKDGLFTAICDYRREMFFKDICIAFQPEQTSLKDYLIQTL                                                          | 105      |
| AB425-AcS17       | MHDPVLESHHLVCEKPQTRRCIERRLALLLSATELFLEKGYDAVSLDDIVNHAGGSKTSIYKYFGNKDGLFTAICDYRREMFFKDICIAFQPEQTSLKDYLIQTL                                                          | 105      |
| AB429-AcS27       | MHDPVLESHHLVCEKPQTRRCIERRLALLLSATELFLEKGYDAVSLDDIVNHAGGSKTSIYKYFGNKDGLFTAICDYRREMFFKDICIAFQPEQTSLKDYLIQTL                                                          | 105      |
| AB426-AcS18       | MHDPVLESHHLVCEKPQTRRCIERRLALLLSATELFLEKGYDAVSLDDIVNHAGGSKTSIYKYFGNKDGLFTAICDYRREMFFKDICIAFQPEQTSLKDYLIQTL                                                          | 105      |
| AB423-MST-SNC-253 | MHDPVLESHHLVCEKPQTRRCIERRLALLLSATELFLEKGYDAVSLDDIVNHAGGSKTSIYKYFGNKDGLFTAICDYRREMFFKDICIAFQPEQTSLKDYLIQTL                                                          | 105      |
| AB218-IK36        | MHDPVLESHHLVCEKPQTRRCIERRLALLLSATELFLEKGYDAVSLDDIVNHAGGSKTSIYKYFGNKDGLFTAICDYRREMFFKDICIAFQPEQTSLKDYLIQTL                                                          | 105      |
| AB353-IK28        | MHDPVLESHHLVCEKPQTRRCIERRLALLLSATELFLEKGYDAVSLDDIVNHAGGSKTSIYKYFGNKDGLFTAICDYRREMFFKDICIAFQPEQTSLKDYLIQTL                                                          | 105      |
| AB347-IK21        | MHDPVLESHHLVCEKPQTRRCIERRLALLLSATELFLEKGYDAVSLDDIVNHAGGSKTSIYKYFGNKDGLFTAICDYRREMFFKDICIAFQPEQTSLKDYLIQTL                                                          | 105      |
| AB343-IK17        | MHDPVLESHHLVCEKPQTRRCIERRLALLLSATELFLEKGYDAVSLDDIVNHAGGSKTSIYKYFGNKDGLFTAICDYRREMFFKDICIAFQPEQTSLKDYLIQTL                                                          | 105      |
| AB340-IK14        | MHDPVLESHHLVCEKPQTRRCIERRLALLLSATELFLEKGYDAVSLDDIVNHAGGSKTSIYKYFGNKDGLFTAICDYRREMFFKDICIAFQPEQTSLKDYLIQTL                                                          | 105      |
| AB219-IK37        | MHDPVLESHHLVCEKQTRRCIERRLALLLSATELFLEKGYDAVSLDDIVNHAGGSKTSIYKYFGNKDGLFTAICDYRREMFFKDICIAFQPEQTSLKDYLIQTL                                                           | 105      |
| AB223-IK41        | MHDPVLESHHLVCEKQTRRCIERRLALLLSATELFLEKGYDAVSLDDIVNHAGGSKTSIYKYFGNKDGLFTAICDYRREMFFKDICIAFQPEQTSLKDYLIQTL                                                           | 105      |
| consensus         | !!!!!!!!!!!!!!!!!!!!*!!!!!!!!!!!!!!!!!!!!!!!!!!!!!!!!!!!!!!!!!!!!!!!!!!!!!!!!!!!!!!!!!!!!!!!!!!!!!!!!!!!!!!!!!!!!!!!!!!!!!!!!!!!!!!!!!!!!!!!!*!!!!!!!!!!!!!!!!!!!! |          |









# Figure 2c – BaeR

|                   |                    |     |
|-------------------|--------------------|-----|
| AB219-IK37        | EWIQAVYGVGYRLEYPEE | 228 |
| AB223-IK41        | EWIQAVYGVGYRLEYPEE | 228 |
| AB426-AcS18       | EWIQAVYGVGYRLEYPEE | 228 |
| AB428-AcS20       | EWIQAVYGVGYRLEYPEE | 228 |
| AB214-IK32        | EWIQAVYGVGYRFEYPEE | 228 |
| ATCC17978         | EWIQAVYGVGYRFEYPEE | 228 |
| AB030             | EWIQAVYGVGYRFEYPEE | 228 |
| AB046             | EWIQAVYGVGYRFEYPEE | 228 |
| AB337-IK11        | EWIQAVYGVGYRFEYPEE | 228 |
| AB338-IK12        | EWIQAVYGVGYRFEYPEE | 228 |
| AB339-IK13        | EWIQAVYGVGYRFEYPEE | 228 |
| AB340-IK14        | EWIQAVYGVGYRFEYPEE | 228 |
| AB341-IK15        | EWIQAVYGVGYRFEYPEE | 228 |
| AB342-IK16        | EWIQAVYGVGYRFEYPEE | 228 |
| AB343-IK17        | EWIQAVYGVGYRFEYPEE | 228 |
| AB345-IK19        | EWIQAVYGVGYRFEYPEE | 228 |
| AB346-IK20        | EWIQAVYGVGYRFEYPEE | 228 |
| AB347-IK21        | EWIQAVYGVGYRFEYPEE | 228 |
| AB351-IK26        | EWIQAVYGVGYRFEYPEE | 228 |
| AB352-IK27        | EWIQAVYGVGYRFEYPEE | 228 |
| AB215-IK33        | EWIQAVYGVGYRFEYPEE | 228 |
| AB216-IK34        | EWIQAVYGVGYRFEYPEE | 228 |
| AB218-IK36        | EWIQAVYGVGYRFEYPEE | 228 |
| AB220-IK38        | EWIQAVYGVGYRFEYPEE | 228 |
| AB224-IK42        | EWIQAVYGVGYRFEYPEE | 228 |
| AB420-MST-SNC-5   | EWIQAVYGVGYRFEYPEE | 228 |
| AB052-MST-SNC-8   | EWIQAVYGVGYRFEYPEE | 228 |
| AB421-MST-SNC-9   | EWIQAVYGVGYRFEYPEE | 228 |
| AB422-MST-SNC-24  | EWIQAVYGVGYRFEYPEE | 228 |
| AB423-MST-SNC-253 | EWIQAVYGVGYRFEYPEE | 228 |
| AB424-AcS9        | EWIQAVYGVGYRFEYPEE | 228 |
| AB425-AcS17       | EWIQAVYGVGYRFEYPEE | 228 |
| AB427-AcS19       | EWIQAVYGVGYRFEYPEE | 228 |
| AB429-AcS27       | EWIQAVYGVGYRFEYPEE | 228 |
| AB353-IK28        | EWIQAVYGVGYRLEYPEE | 228 |
| AB354-IK29        | EWIQAVYGVGYRLEYPEE | 228 |
| consensus         | !!!!!!!!!!!!*!!!!  |     |

X non-conserved  
X ≥ 50% conserved









# Figure 4 – AdeL

|                   |                                                                                                                                  |     |
|-------------------|----------------------------------------------------------------------------------------------------------------------------------|-----|
| ATCC17978         | CDK <b>X</b> ETGHE <b>X</b> Y <b>X</b> T <b>X</b> IR <b>X</b> TL <b>X</b> VE <b>X</b> Q <b>X</b> HN <b>X</b> IAEAYTL <b>X</b> KT | 343 |
| AB030             | .....                                                                                                                            | 196 |
| AB046             | CDK <b>X</b> ETGHE <b>X</b> Y <b>X</b> T <b>X</b> IR <b>X</b> TL <b>X</b> VE <b>X</b> Q <b>X</b> HN <b>X</b> IAEAYTL <b>X</b> KT | 343 |
| AB337-IK11        | CDK <b>X</b> ETGHE <b>X</b> Y <b>X</b> T <b>X</b> IR <b>X</b> TL <b>X</b> VE <b>X</b> Q <b>X</b> HN <b>X</b> IAEAYTL <b>X</b> KT | 343 |
| AB338-IK12        | CDK <b>X</b> ETGHE <b>X</b> Y <b>X</b> T <b>X</b> IR <b>X</b> TL <b>X</b> VE <b>X</b> Q <b>X</b> HN <b>X</b> IAEAYTL <b>X</b> KT | 343 |
| AB339-IK13        | CDK <b>X</b> ETGHE <b>X</b> Y <b>X</b> T <b>X</b> IR <b>X</b> TL <b>X</b> VE <b>X</b> Q <b>X</b> HN <b>X</b> IAEAYTL <b>X</b> KT | 343 |
| AB340-IK14        | CDK <b>X</b> ETGHE <b>X</b> Y <b>X</b> T <b>X</b> IR <b>X</b> TL <b>X</b> VE <b>X</b> Q <b>X</b> HN <b>X</b> IAEAYTL <b>X</b> KT | 343 |
| AB341-IK15        | CDK <b>X</b> ETGHE <b>X</b> Y <b>X</b> T <b>X</b> IR <b>X</b> TL <b>X</b> VE <b>X</b> Q <b>X</b> HN <b>X</b> IAEAYTL <b>X</b> KT | 343 |
| AB342-IK16        | CDK <b>X</b> ETGHE <b>X</b> Y <b>X</b> T <b>X</b> IR <b>X</b> TL <b>X</b> VE <b>X</b> Q <b>X</b> HN <b>X</b> IAEAYTL <b>X</b> KT | 343 |
| AB343-IK17        | CDK <b>X</b> ETGHE <b>X</b> Y <b>X</b> T <b>X</b> IR <b>X</b> TL <b>X</b> VE <b>X</b> Q <b>X</b> HN <b>X</b> IAEAYTL <b>X</b> KT | 343 |
| AB345-IK19        | CDK <b>X</b> ETGHE <b>X</b> Y <b>X</b> T <b>X</b> IR <b>X</b> TL <b>X</b> VE <b>X</b> Q <b>X</b> HN <b>X</b> IAEAYTL <b>X</b> KT | 343 |
| AB346-IK20        | CDK <b>X</b> ETGHE <b>X</b> Y <b>X</b> T <b>X</b> IR <b>X</b> TL <b>X</b> VE <b>X</b> Q <b>X</b> HN <b>X</b> IAEAYTL <b>X</b> KT | 343 |
| AB347-IK21        | CDK <b>X</b> ETGHE <b>X</b> Y <b>X</b> T <b>X</b> IR <b>X</b> TL <b>X</b> VE <b>X</b> Q <b>X</b> HN <b>X</b> IAEAYTL <b>X</b> KT | 343 |
| AB351-IK26        | CDK <b>X</b> ETGHE <b>X</b> Y <b>X</b> T <b>X</b> IR <b>X</b> TL <b>X</b> VE <b>X</b> Q <b>X</b> HN <b>X</b> IAEAYTL <b>X</b> KT | 343 |
| AB352-IK27        | CDK <b>X</b> ETGHE <b>X</b> Y <b>X</b> T <b>X</b> IR <b>X</b> TL <b>X</b> VE <b>X</b> Q <b>X</b> HN <b>X</b> IAEAYTL <b>X</b> KT | 343 |
| AB353-IK28        | CDK <b>X</b> ETGHE <b>X</b> Y <b>X</b> T <b>X</b> IR <b>X</b> TL <b>X</b> VE <b>X</b> Q <b>X</b> HN <b>X</b> IAEAYTL <b>X</b> KT | 343 |
| AB354-IK29        | CDK <b>X</b> ETGHE <b>X</b> Y <b>X</b> T <b>X</b> IR <b>X</b> TL <b>X</b> VE <b>X</b> Q <b>X</b> HN <b>X</b> IAEAYTL <b>X</b> KT | 343 |
| AB214-IK32        | CDK <b>X</b> ETGHE <b>X</b> Y <b>X</b> T <b>X</b> IR <b>X</b> TL <b>X</b> VE <b>X</b> Q <b>X</b> HN <b>X</b> IAEAYTL <b>X</b> KT | 343 |
| AB215-IK33        | CDK <b>X</b> ETGHE <b>X</b> Y <b>X</b> T <b>X</b> IR <b>X</b> TL <b>X</b> VE <b>X</b> Q <b>X</b> HN <b>X</b> IAEAYTL <b>X</b> KT | 343 |
| AB216-IK34        | CDK <b>X</b> ETGHE <b>X</b> Y <b>X</b> T <b>X</b> IR <b>X</b> TL <b>X</b> VE <b>X</b> Q <b>X</b> HN <b>X</b> IAEAYTL <b>X</b> KT | 343 |
| AB218-IK36        | CDK <b>X</b> ETGHE <b>X</b> Y <b>X</b> T <b>X</b> IR <b>X</b> TL <b>X</b> VE <b>X</b> Q <b>X</b> HN <b>X</b> IAEAYTL <b>X</b> KT | 343 |
| AB219-IK37        | CDK <b>X</b> ETGHE <b>X</b> Y <b>X</b> T <b>X</b> IR <b>X</b> TL <b>X</b> VE <b>X</b> Q <b>X</b> HN <b>X</b> IAEAYTL <b>X</b> KT | 343 |
| AB220-IK38        | CDK <b>X</b> ETGHE <b>X</b> Y <b>X</b> T <b>X</b> IR <b>X</b> TL <b>X</b> VE <b>X</b> Q <b>X</b> HN <b>X</b> IAEAYTL <b>X</b> KT | 343 |
| AB223-IK41        | CDK <b>X</b> ETGHE <b>X</b> Y <b>X</b> T <b>X</b> IR <b>X</b> TL <b>X</b> VE <b>X</b> Q <b>X</b> HN <b>X</b> IAEAYTL <b>X</b> KT | 343 |
| AB224-IK42        | CDK <b>X</b> ETGHE <b>X</b> Y <b>X</b> T <b>X</b> IR <b>X</b> TL <b>X</b> VE <b>X</b> Q <b>X</b> HN <b>X</b> IAEAYTL <b>X</b> KT | 343 |
| AB052-MST-SNC-8   | CDK <b>X</b> ETGHE <b>X</b> Y <b>X</b> T <b>X</b> IR <b>X</b> TL <b>X</b> VE <b>X</b> Q <b>X</b> HN <b>X</b> IAEAYTL <b>X</b> KT | 343 |
| AB421-MST-SNC-9   | CDK <b>X</b> ETGHE <b>X</b> Y <b>X</b> T <b>X</b> IR <b>X</b> TL <b>X</b> VE <b>X</b> Q <b>X</b> HN <b>X</b> IAEAYTL <b>X</b> KT | 343 |
| AB422-MST-SNC-24  | CDK <b>X</b> ETGHE <b>X</b> Y <b>X</b> T <b>X</b> IR <b>X</b> TL <b>X</b> VE <b>X</b> Q <b>X</b> HN <b>X</b> IAEAYTL <b>X</b> KT | 343 |
| AB423-MST-SNC-253 | CDK <b>X</b> ETGHE <b>X</b> Y <b>X</b> T <b>X</b> IR <b>X</b> TL <b>X</b> VE <b>X</b> Q <b>X</b> HN <b>X</b> IAEAYTL <b>X</b> KT | 343 |
| AB424-AcS9        | CDK <b>X</b> ETGHE <b>X</b> Y <b>X</b> T <b>X</b> IR <b>X</b> TL <b>X</b> VE <b>X</b> Q <b>X</b> HN <b>X</b> IAEAYTL <b>X</b> KT | 343 |
| AB425-AcS17       | CDK <b>X</b> ETGHE <b>X</b> Y <b>X</b> T <b>X</b> IR <b>X</b> TL <b>X</b> VE <b>X</b> Q <b>X</b> HN <b>X</b> IAEAYTL <b>X</b> KT | 343 |
| AB426-AcS18       | CDK <b>X</b> ETGHE <b>X</b> Y <b>X</b> T <b>X</b> IR <b>X</b> TL <b>X</b> VE <b>X</b> Q <b>X</b> HN <b>X</b> IAEAYTL <b>X</b> KT | 343 |
| AB427-AcS19       | CDK <b>X</b> ETGHE <b>X</b> Y <b>X</b> T <b>X</b> IR <b>X</b> TL <b>X</b> VE <b>X</b> Q <b>X</b> HN <b>X</b> IAEAYTL <b>X</b> KT | 343 |
| AB428-AcS20       | CDK <b>X</b> ETGHE <b>X</b> Y <b>X</b> T <b>X</b> IR <b>X</b> TL <b>X</b> VE <b>X</b> Q <b>X</b> HN <b>X</b> IAEAYTL <b>X</b> KT | 343 |
| AB429-AcS27       | CDK <b>X</b> ETGHE <b>X</b> Y <b>X</b> T <b>X</b> IR <b>X</b> TL <b>X</b> VE <b>X</b> Q <b>X</b> HN <b>X</b> IAEAYTL <b>X</b> KT | 343 |
| AB420-MST-SNC-5   | CDK <b>X</b> ETGHE <b>X</b> Y <b>X</b> T <b>X</b> IR <b>X</b> TL <b>X</b> VE <b>X</b> Q <b>X</b> HN <b>X</b> IAEAYTL <b>X</b> KT | 343 |
| consensus         | *****                                                                                                                            |     |

**X** non-conserved  
**X** ≥ 50% conserved



# Figure 4b – Motility – Tank milk

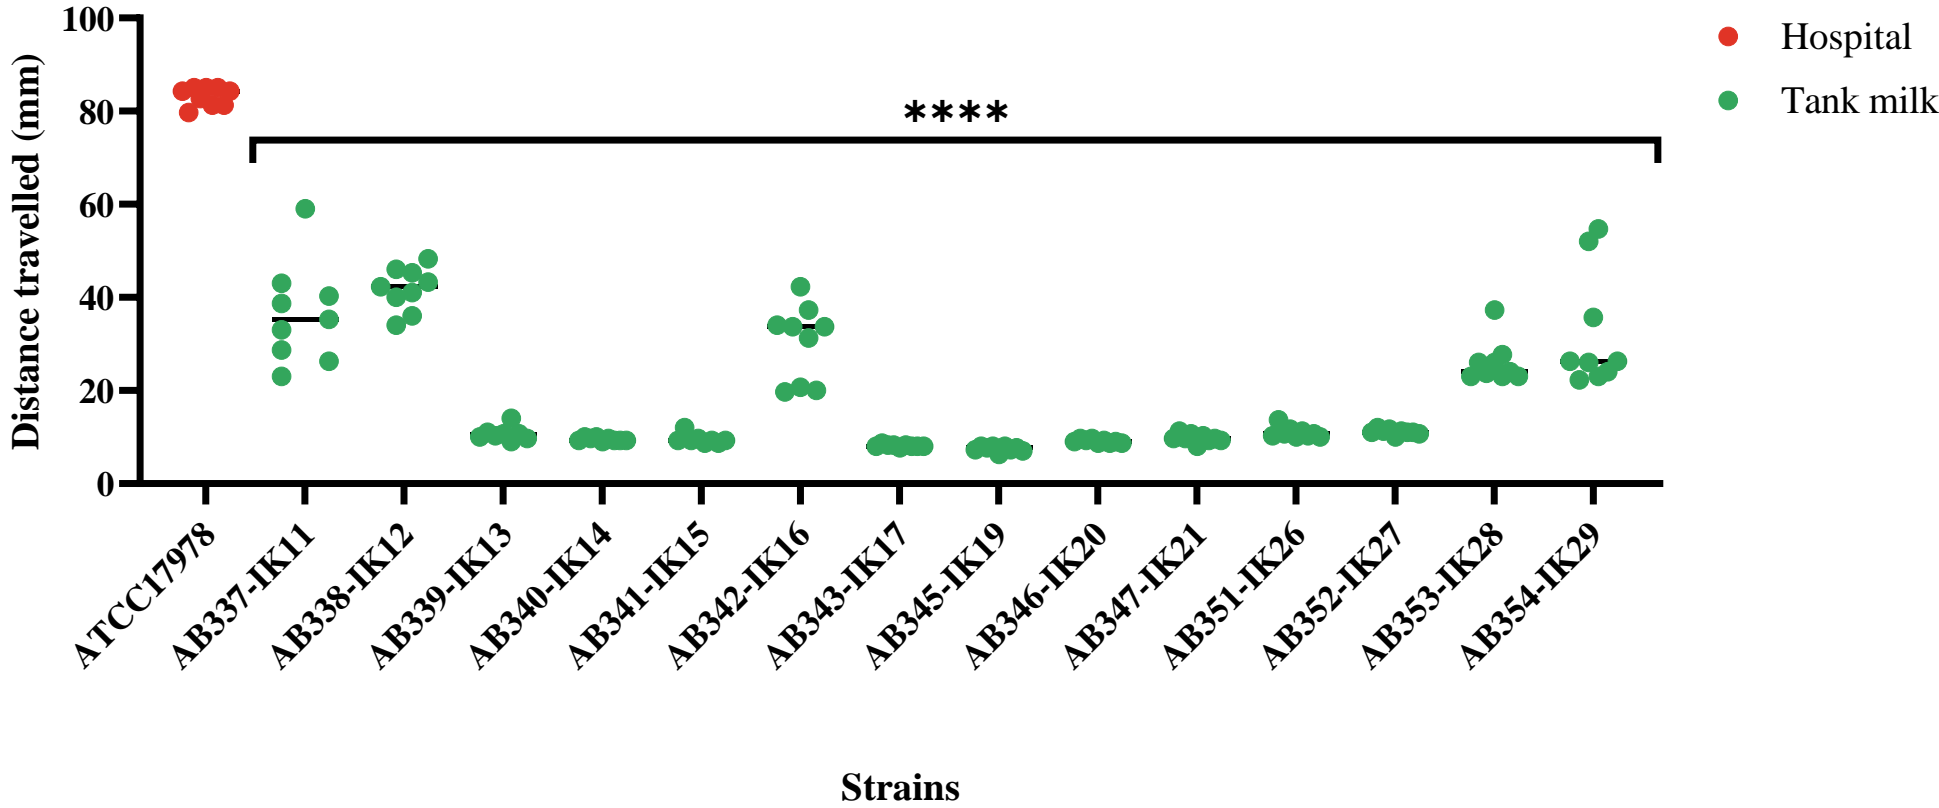

# Figure 4c – Motility - Stream and WWE

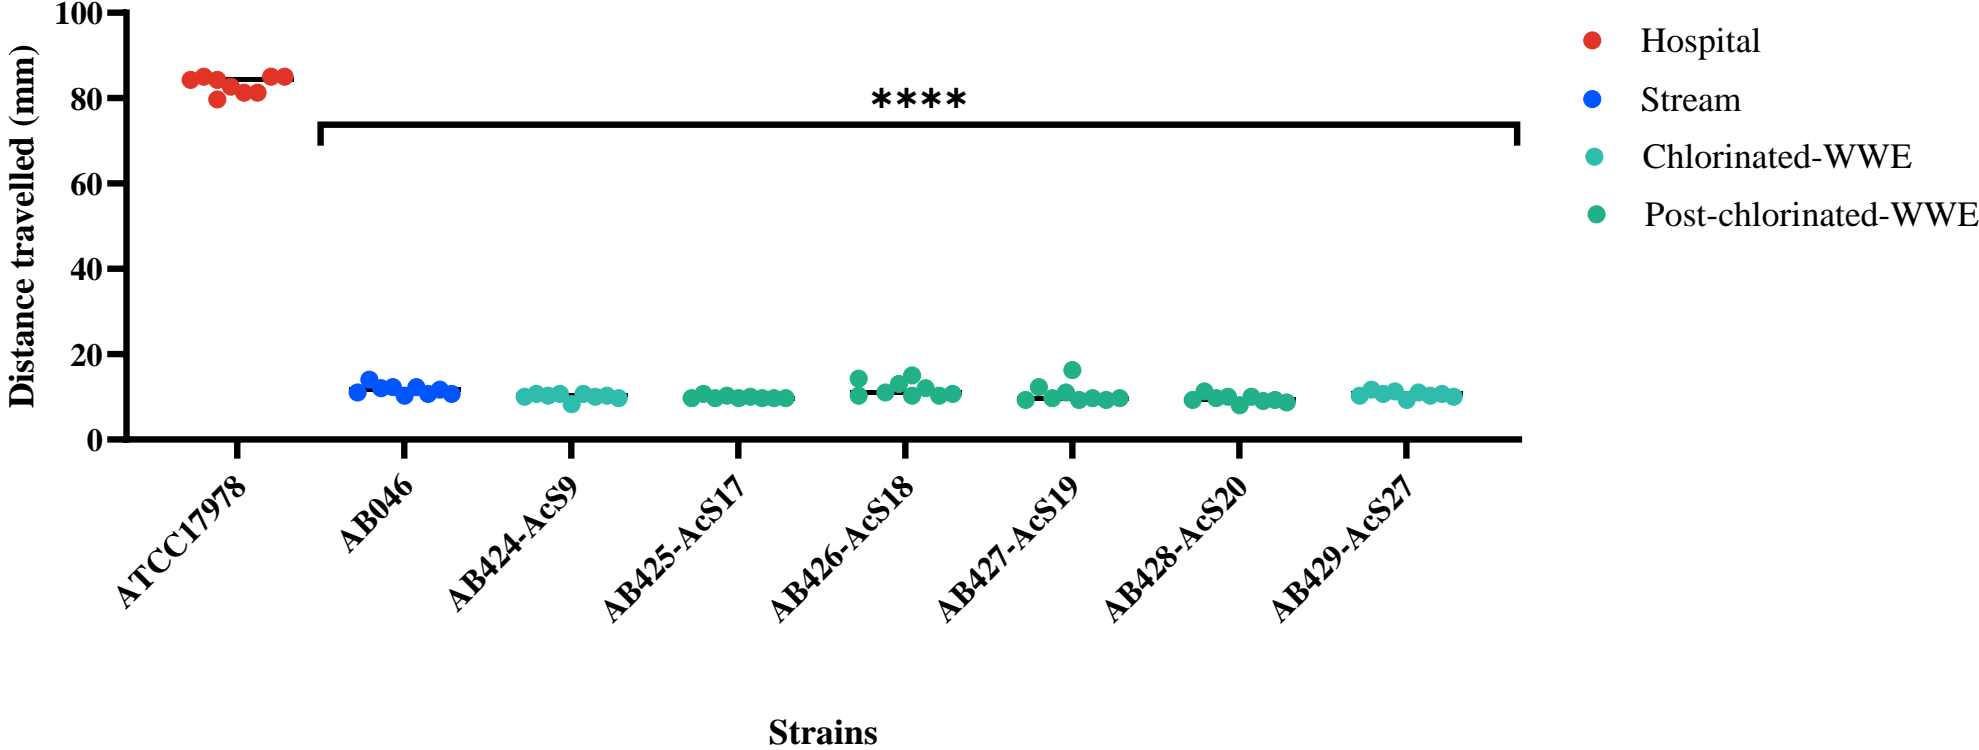

# Figure 4d – Motility – Agricultural Surface Water

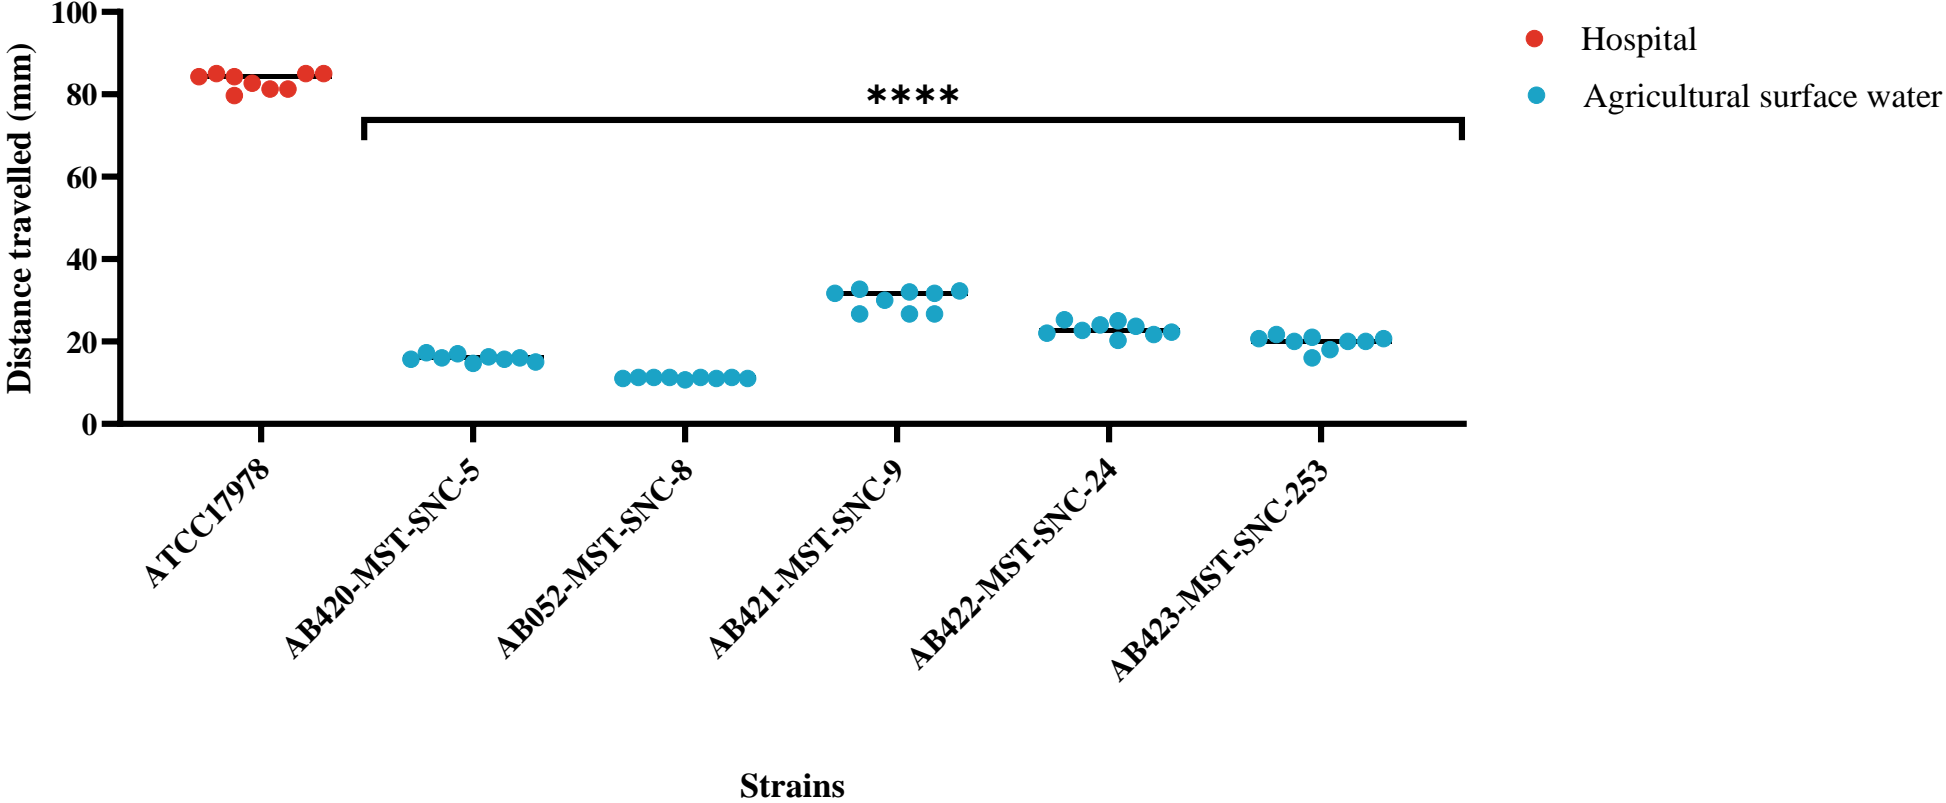



# Figure 5a: Biofilm Formation - Hospital

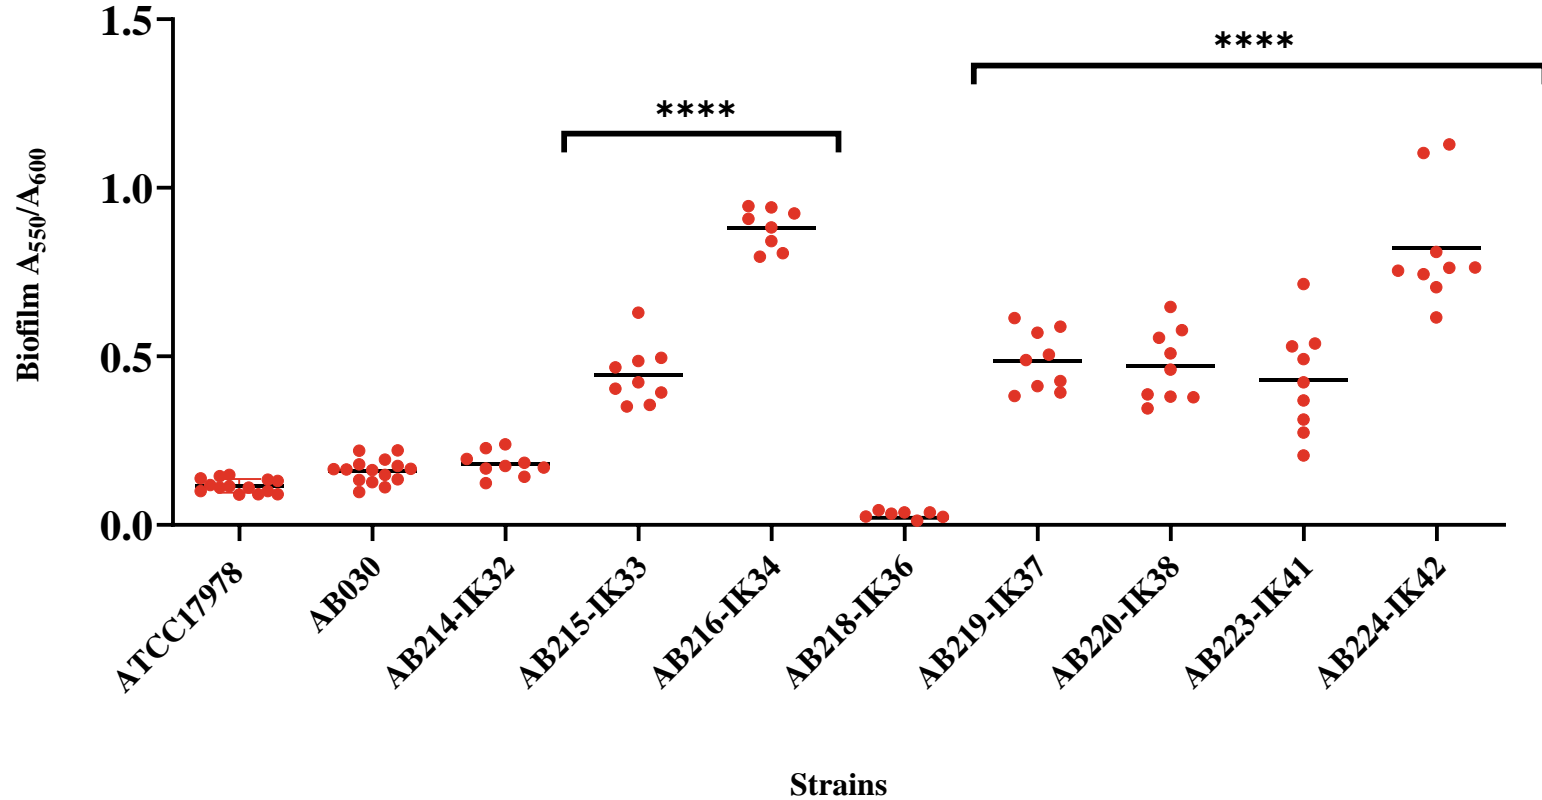

# Figure 5b: Biofilm Formation – Tank milk

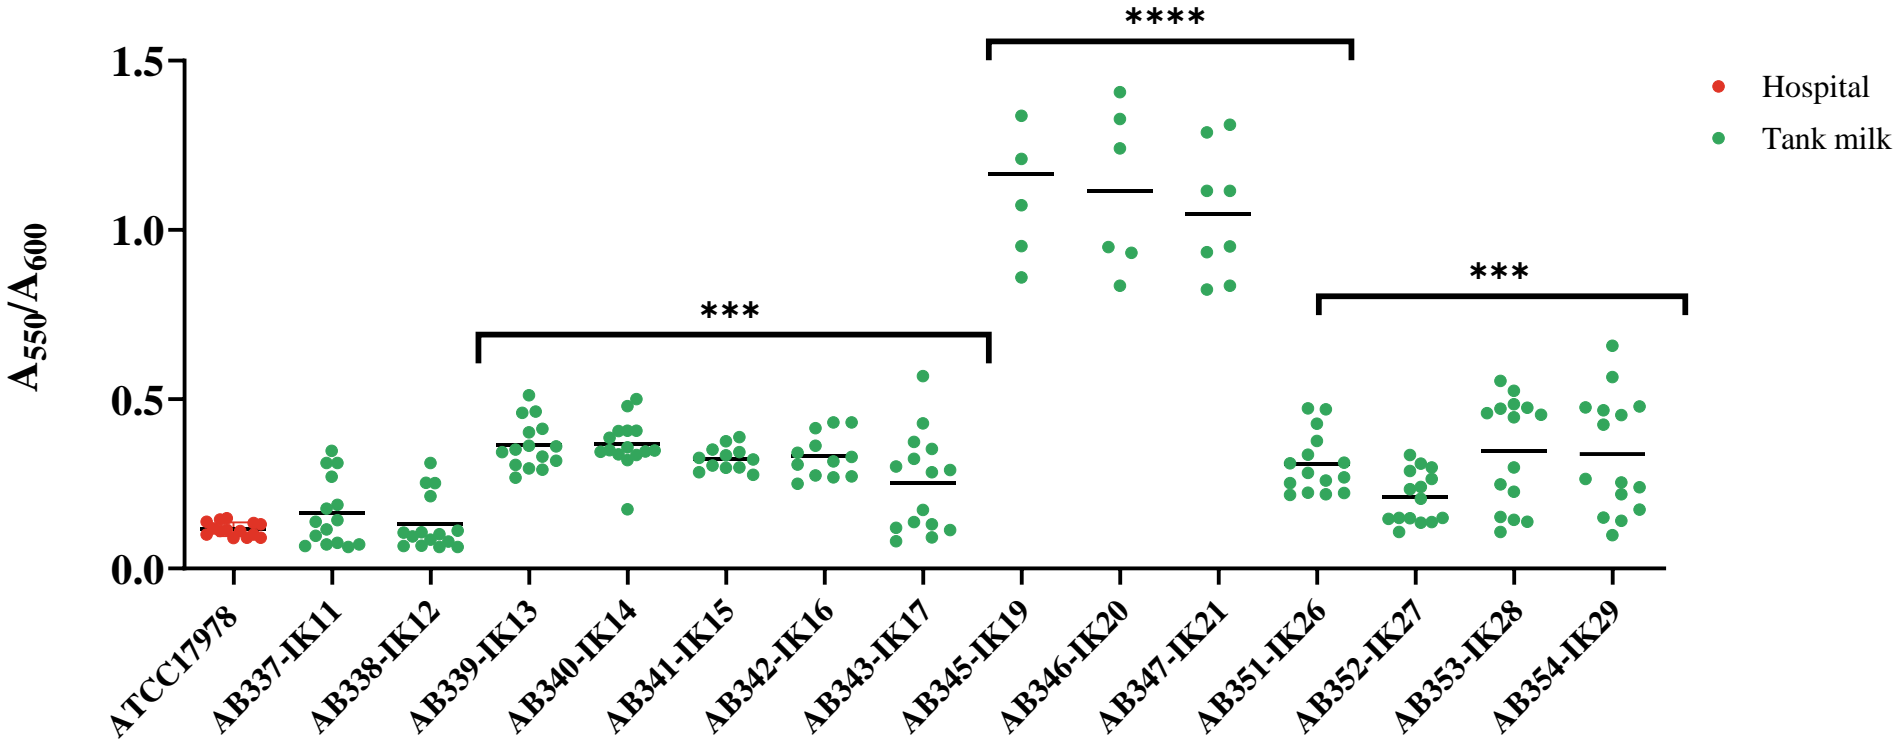

# Figure 5c: Biofilm Formation – Stream and WWTP

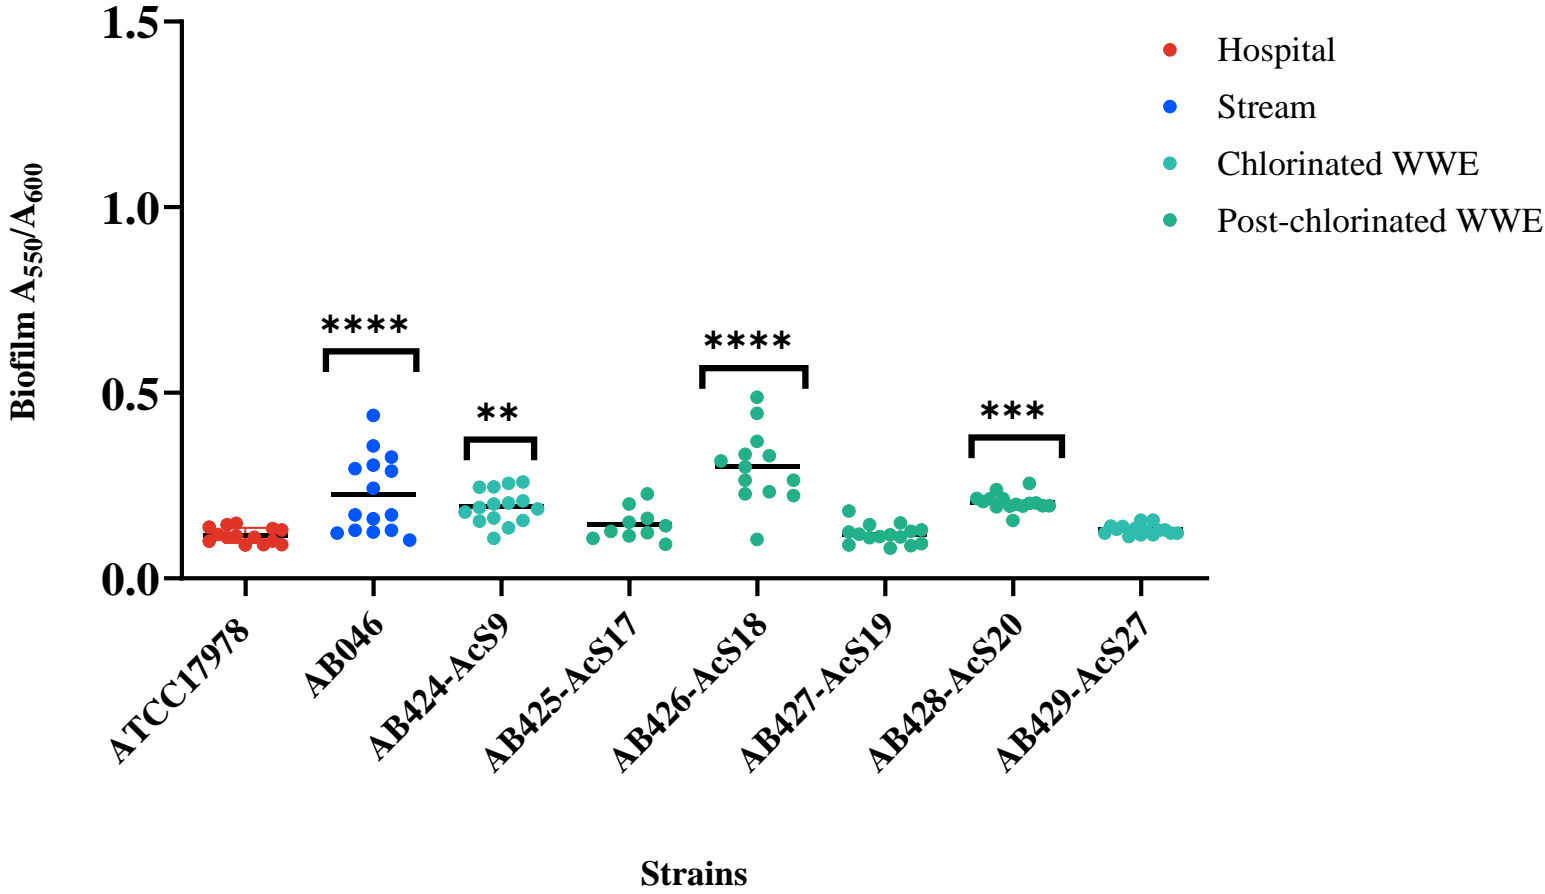

# Figure 5d: Biofilm Formation – Agricultural Surface water

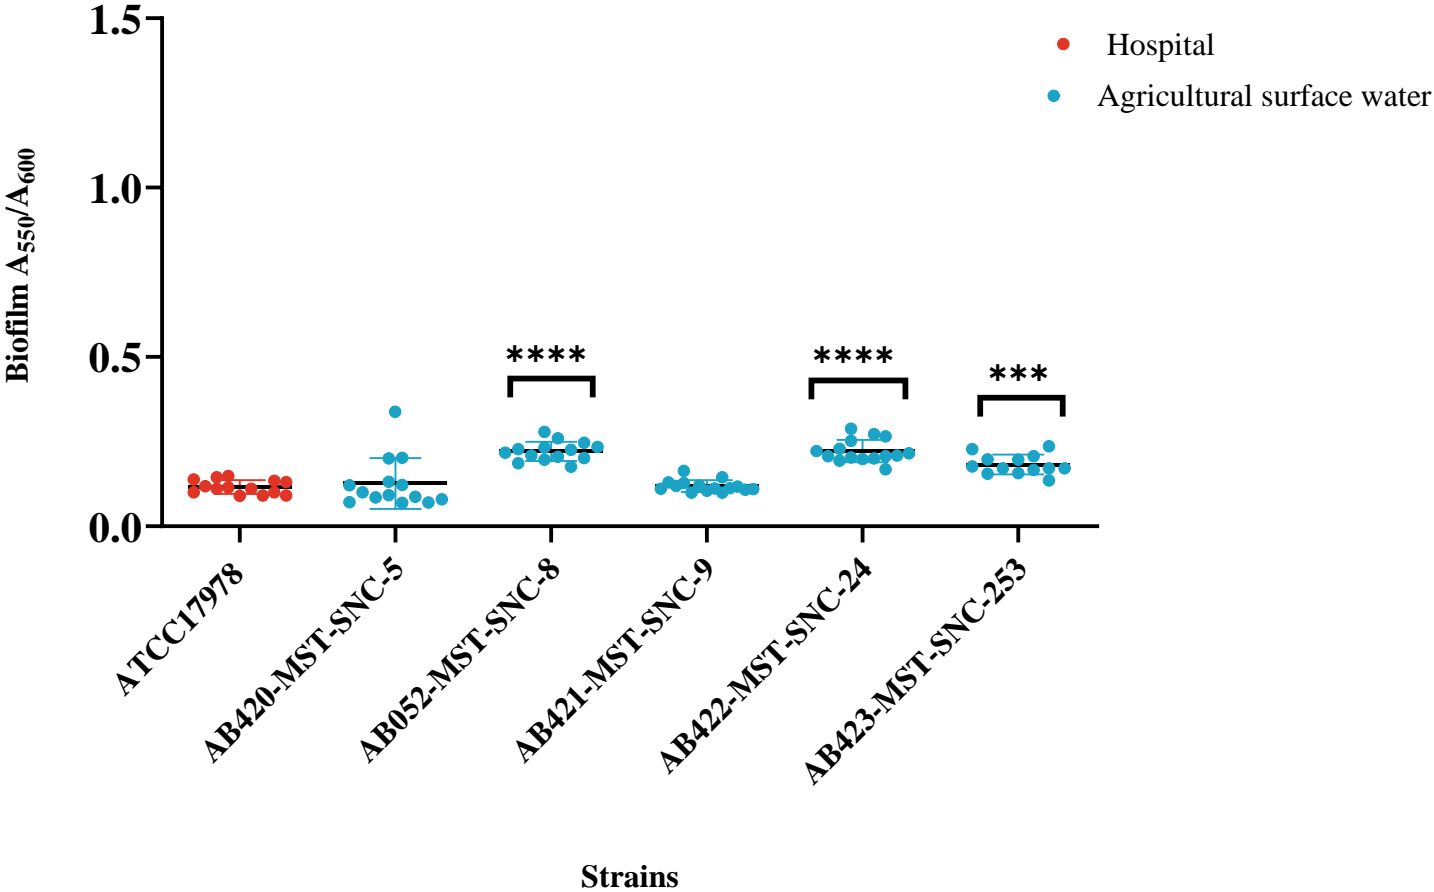

# Figure 6: Spearman's Correlation Analysis of Motility and Biofilm Formation

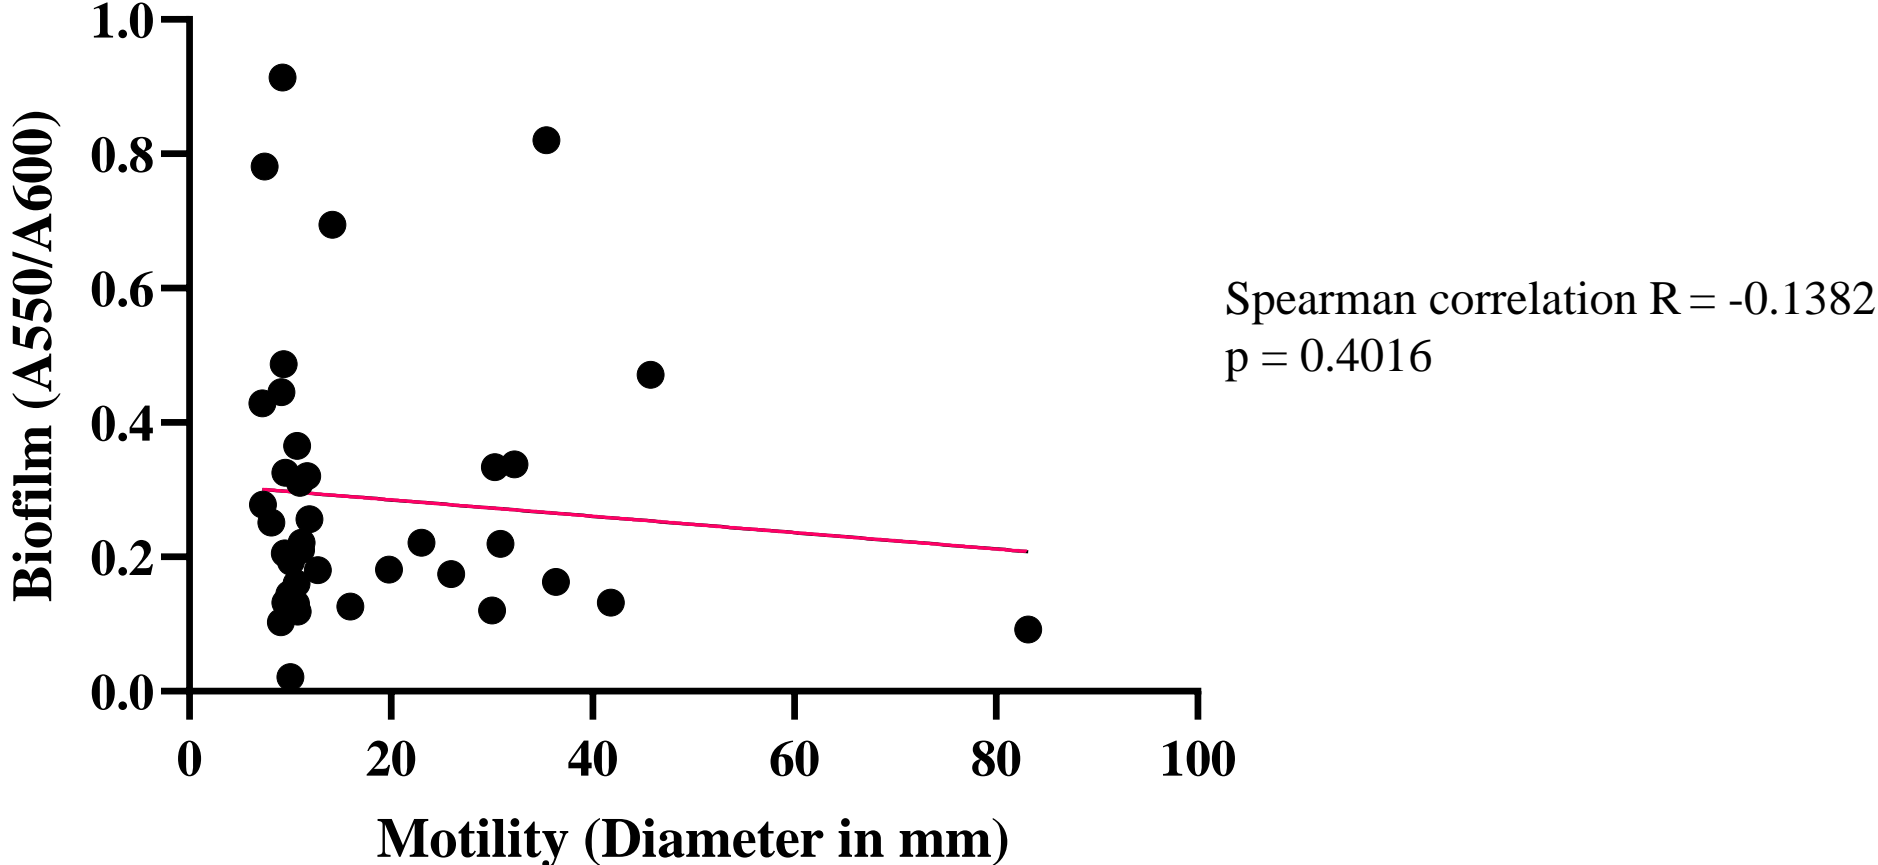

Supplement: msphere.00741-23-s0001.pdf [file msphere.00741-23-s0001.pdf]
